# Supplementary material for: Open-type capillary-assembled microchip for rapid, single-step, simultaneous multi-component analysis of serum sample
Source: Royal Society of Chemistry journal article supplement (doi:10.1039/c2ra21843g), 2012-01-01

## Supporting Information

### Open-Type Capillary-Assembled Microchip for Rapid, Single-Step, Simultaneous Multi-Component Analysis of Serum Sample

Yusuke Kimura, Terence G. Henares, Shun-ichi Funano, Tatsuro Endo, Hideaki Hisamoto\*

Graduate School of Engineering, Osaka Prefecture University, 1-1 Gakuen-cho, Naka-ku, Sakai City, Osaka 599-8531, Japan. E-mail: hisamoto@chem.osakafu-u.ac.jp; Fax: +81-72-254-9284; Tel: +81-72-254-9285

Calibration curves obtained from the capillary sensors for various analytes.

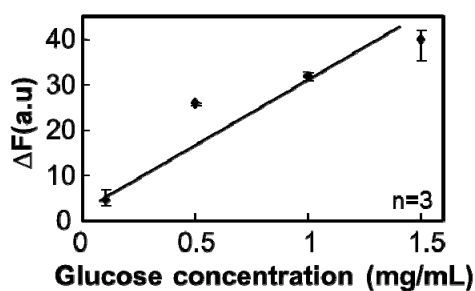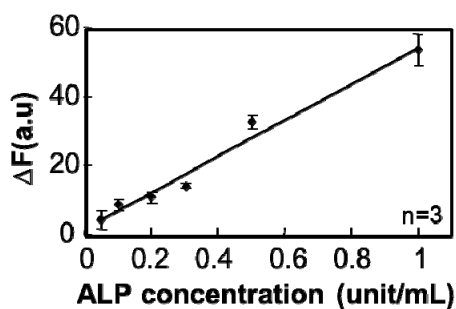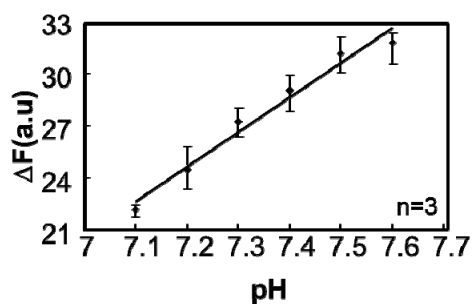

Supplement: c2ra21843g.pdf [file c2ra21843g.pdf]
